# Supplementary material for: On the role of energy infrastructure in the energy transition. Case study of an energy independent and CO2 neutral energy system for Switzerland
Source: Frontiers journal article supplement (doi:10.3389/fenrg.2023.1164813), 2023-05-30
Supplement: Data_Sheet_1.PDF [file Data_Sheet_1.PDF]

## 2 **Supplementary Material**

### GRID CHARACTERIZATION

#### 3 **Temporal resolution differences**

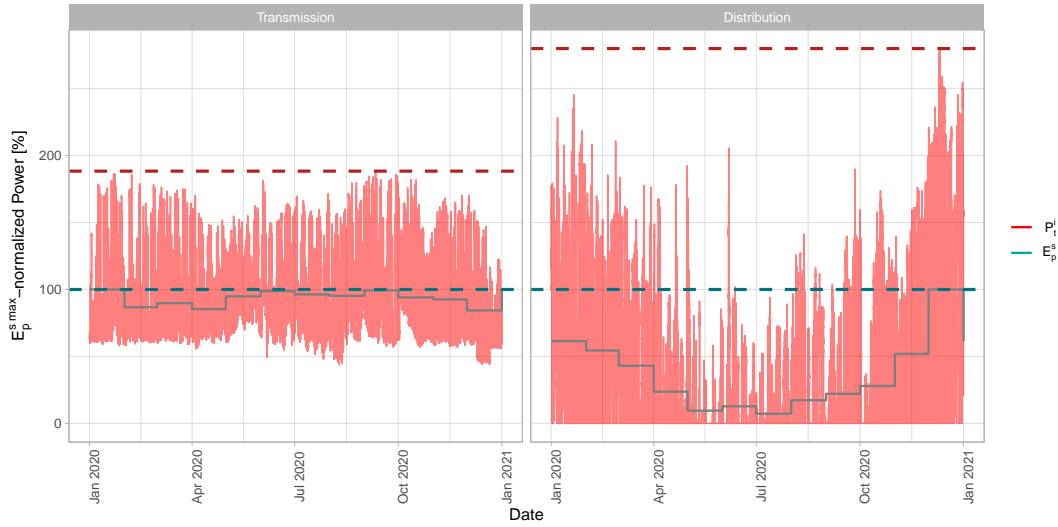

**Figure S1.** Time evolution of the observed  $P_g$  [GW<sup>15min</sup>] and the modeled power curves  $\dot{E}_g^s$  [GW<sup>TP</sup>] for transmission and distribution, normalized by the maximum modeled power  $\dot{E}_g^{s,max}$  [GW<sup>TP</sup>] (Swissgrid, 2022). The ratio between the maximum of the power curves (dashed) corresponds to the observation coefficient  $k_g^{P \leftrightarrow \dot{E}}$ .

4 In order to assess differences between real world installations and the computer model, we integrate  $k_g^{i \leftrightarrow j}$   
5 scaling factors. We distinguish three different powers

- 6 1.  $\dot{E}_g^s$  the power modeled in EnergyScope with an average power over the typical modeling period  
7  $TP$  [GW<sup>TP</sup>]
- 8 2.  $P_g^i$  the power measured in the network at a frequency of 15 minutes [GW<sup>15min</sup>]
- 9 3.  $S_g^{inst}$  the installed network power estimated by an engineer, to satisfy the instantaneous power variations  
10 [GW<sup>instantaneous</sup>]

11 Figure S1 depicts the estimation of the safety coefficient between observation (1) and installation (2),  
12 which is performed by calculating the ratio of the maxima of the averages between the measured data  
13  $P_g^i$  [GW<sup>15min</sup>] to the sizes of the installed transformers (Gupta et al., 2021). We therefore proceed at  
14 identifying the maximum annual power per transformer of voltage level  $P_g^{i,max}$  at the typical installation  
15 size of the transformer  $S_g^{inst}$ , from which the installation safety coefficient  $k_g^{P \leftrightarrow S}$  can be estimated.

## 16 Grid parameters

17 The grid parameters are summarised in table S1 while the technical details and sources of the different  
 18 parameters can be accessed in [https://gitlab.com/ipese/on-the-role-of-energy-](https://gitlab.com/ipese/on-the-role-of-energy-infrastructure-in-the-energy-transition)  
 19 [infrastructure-in-the-energy-transition](https://gitlab.com/ipese/on-the-role-of-energy-infrastructure-in-the-energy-transition). The confidence interval has been selected as  
 20  $\pm 25\%$ , except for the reference length  $l_g^{ref}$ , where the validation showed a cumulative error of  $\pm 23.1\%$ , as  
 21 for the scaling factors varying  $k_g^{P \leftrightarrow S} = 3_{-0.40}^{+0.18}$  and  $k_g^{\dot{E} \leftrightarrow P} = 2_{-0.11}^{+0.76}$ .  
 22 The approach to assess the those differences can be applied to a different time resolution, such as the  
 23 for example the hourly one (Limpens et al., 2019). In latter case, we are be able to better assess the load  
 24 variations throughout the year and therefore leads to a higher  $k_g^{\dot{E}[h] \leftrightarrow S} = 2.93_{-0.15}^{+1.13}$ .

**Table S1.** Grid infrastructure techno-economic characterization with uncertainty bounds of electricity grid, methane and hydrogen pressure grid, split in the four power levels. Case study for a geographically averaged Swiss energy system, based on the deployed capacities in 2020.

|                                     | Confidence Interval | EHV/P |                 |                             | HV/P  |                 |                             | MV/P  |                 |                             | LV/P  |                 |                             |
|-------------------------------------|---------------------|-------|-----------------|-----------------------------|-------|-----------------|-----------------------------|-------|-----------------|-----------------------------|-------|-----------------|-----------------------------|
|                                     |                     | Elec. | CH <sub>4</sub> | H <sub>2</sub> <sup>1</sup> | Elec. | CH <sub>4</sub> | H <sub>2</sub> <sup>1</sup> | Elec. | CH <sub>4</sub> | H <sub>2</sub> <sup>1</sup> | Elec. | CH <sub>4</sub> | H <sub>2</sub> <sup>1</sup> |
| $l_g^{tot}$<br>[10 <sup>3</sup> km] | $\pm 25\%$          | 6.7   | 0.71            | 0.71                        | 8.9   | 0.94            | 0.94                        | 43    | 4.35            | 4.35                        | 130   | 9.7             | 9.7                         |
| $n_g$<br>[—]                        | $\pm 25\%$          | 137   | 20              | 20                          | 775   | 116             | 116                         | 15490 | 2039            | 2039                        | 2.2 M | 440 k           | 440k                        |
| $l_g^{ref}$<br>[km]                 | $\pm 23.1\%^2$      | 48.9  | 35.5            | 35.5                        | 11.5  | 8.10            | 8.10                        | 2.8   | 2.13            | 2.13                        | 0.06  | 0.11            | 0.11                        |
| $S_g^{\theta}$<br>[MW]              | $\pm 25\%$          | 1700  | 51500           | 12133                       | 500   | 6140            | 1557                        | 30    | 425             | 132                         | 0.3   | 0.425           | 0.2                         |
| $C_g^{inv}$<br>[MCHF/kmGW]          | $\pm 25\%$          | 3.4   | 0.0768          | 0.326                       | 5.2   | 0.227           | 0.895                       | 53.3  | 0.484           | 1.557                       | 500   | 13.593          | 55.7                        |

<sup>1</sup> Hydrogen grid infrastructure not existing yet. For modeling and comparison purposes, assumed to be equal to the natural gas pressure grid.

<sup>2</sup> Precision according to the cumulative error of the grid length equidistant estimation to the reported length by Gupta et al. (2021).

## 25 Grid infrastructure

26 Applying a geographical averaged model, leads to uncertainty related to the characterization of the  
 27 existing infrastructure. We assess latter uncertainty by analyzing the reported electric transformer sizes at  
 28 different levels from Gupta et al. (2021). The confidence interval of the distribution is reported in table S2.  
 29 We observe that with decreasing voltage level, the 95 % confidence interval is increasing from 27.6 % up to  
 30 72.4 %. The applied methodology is therefore subject to the limitation of the uncertainty in the distribution  
 31 level. In order to resolve this limitation and assess the role of self-sufficiency and decentralization, we need  
 32 to integrate the role of districts within the global energy system, publication currently in redaction.

**Table S2.** Grid size validation by assessing the reported value with the geographic distribution reported by Gupta et al. (2021).

| Level | $S_g^{\theta}$<br>[MW] | $S_g^{min}$<br>[MW] | $S_g^{max}$<br>[MW] | $S_g^{95\%}$<br>[MW]       |
|-------|------------------------|---------------------|---------------------|----------------------------|
| EHV   | 1700                   | 1246.67             | 2153.33             | $1721.4_{-474.7}^{+431.2}$ |
| HV    | 500                    | 193.55              | 806.45              | $470.6_{-138.3}^{+152.9}$  |
| MV    | 30                     | 1.62                | 58.38               | $32.5_{-17.5}^{+0.962}$    |
| LV    | 0.3                    | 0.05                | 0.55                | $0.29_{-0.21}^{+0.15}$     |

## VALIDATION

**Table S3.** Validation of the EnergyScope model by simulating the 2020 energy system configuration by primary energy consumption [TWh]. Comparison of actors.

| Resource        | BFE           | Energy System simulation |            | Economic optimization |               |
|-----------------|---------------|--------------------------|------------|-----------------------|---------------|
|                 |               | EnergyScope              | Difference | EnergyScope           | Difference    |
| Coal            | 1.01          | 0.88                     | -0.13      | 0                     | -1.01         |
| Gasoline        | 23.91         | 23.44                    | -0.47      | 0                     | -23.91        |
| Diesel          | 30.55         | 31.65                    | 1.1        | 0                     | -30.55        |
| CH <sub>4</sub> | 31.35         | 31.69                    | 0.34       | 0                     | -31.35        |
| LFO             | 27.05         | 26.58                    | -0.47      | 0                     | -27.05        |
| Nuclear         | 44.6          | 43.78                    | -0.82      | 0                     | -44.6         |
| Solar PV        | 2.6           | 2.62                     | 0.02       | 52.31                 | 49.71         |
| Water           | 40.61         | 40.61                    | 0          | 40.61                 | 0             |
| Wind            | 0.15          | 0.14                     | -0.01      | 21.02                 | 20.87         |
| Waste           | 16.79         | 17.04                    | -0.25      | 19.75                 | -2.96         |
| Wood            | 10.97         | 11.16                    | 0.19       | 15.28                 | 4.31          |
| <b>Total</b>    | <b>229.59</b> | <b>229.59</b>            | <b>0</b>   | <b>148.97</b>         | <b>-80.62</b> |

33 The simulation of energy system configurations is subject to the assumption of minimizing total system  
 34 costs and to climate target constraints, corresponding to a economically reasonable thinking being. When  
 35 simulating the 2020 energy system, we notice a difference between the minimum cost system, proposed  
 36 as a solution by the model, and the real system, installed in 2020. This difference can be explained by  
 37 the assumed perspectives of the different actors that can be simulated by the model. History did not  
 38 choose to install the most economical solution for the whole, but tries to optimize his personal well-being  
 39 with a certain inertia, resulting from a multitude of sometimes contradictory information sources. At  
 40 the implementation level, the tendency to conserve the existing system means adding constraints to the  
 41 economic optimization model in order to reproduce the 2020 configuration.

42 In order to validate the model, both behavioral perspectives were applied and summarized in table S3. The  
 43 additional constraint applied to historical configuration is to reproduce, by minimizing the total difference,  
 44 the primary energy consumption reported in the Swiss Global Energy Statistics (Kost, Michael, 2021).  
 45 Then, the results obtained for the two configurations are compared to the real Swiss system.

46 The major differences between the optimization and simulation results in 2020 can be explained by (i) more  
 47 efficient conversion technologies in the EnergyScope model than those installed in 2020 and (ii) the use  
 48 of resources for purposes other than those modeled. Due to the constraint imposed, the model exactly  
 49 reproduces the total primary consumption. However, the largest differences are observed in the share of  
 50 fossil and nuclear energy used.

51 The solutions reported for the optimization illustrate the difference in total configuration. The economic  
 52 optimization under the constraints of climate neutrality (no net CO<sub>2</sub> emissions) and independence (without  
 53 imports) leads the model to a fully renewable and more efficient energy system, with primary energy  
 54 consumption reduced by 80.62 TWh, or -29%, compared to the total primary energy consumption of  
 55 278 TWh.

## GRID REINFORCEMENT IN ECONOMIC OPTIMIZATION

### 56 Uncertainty analysis

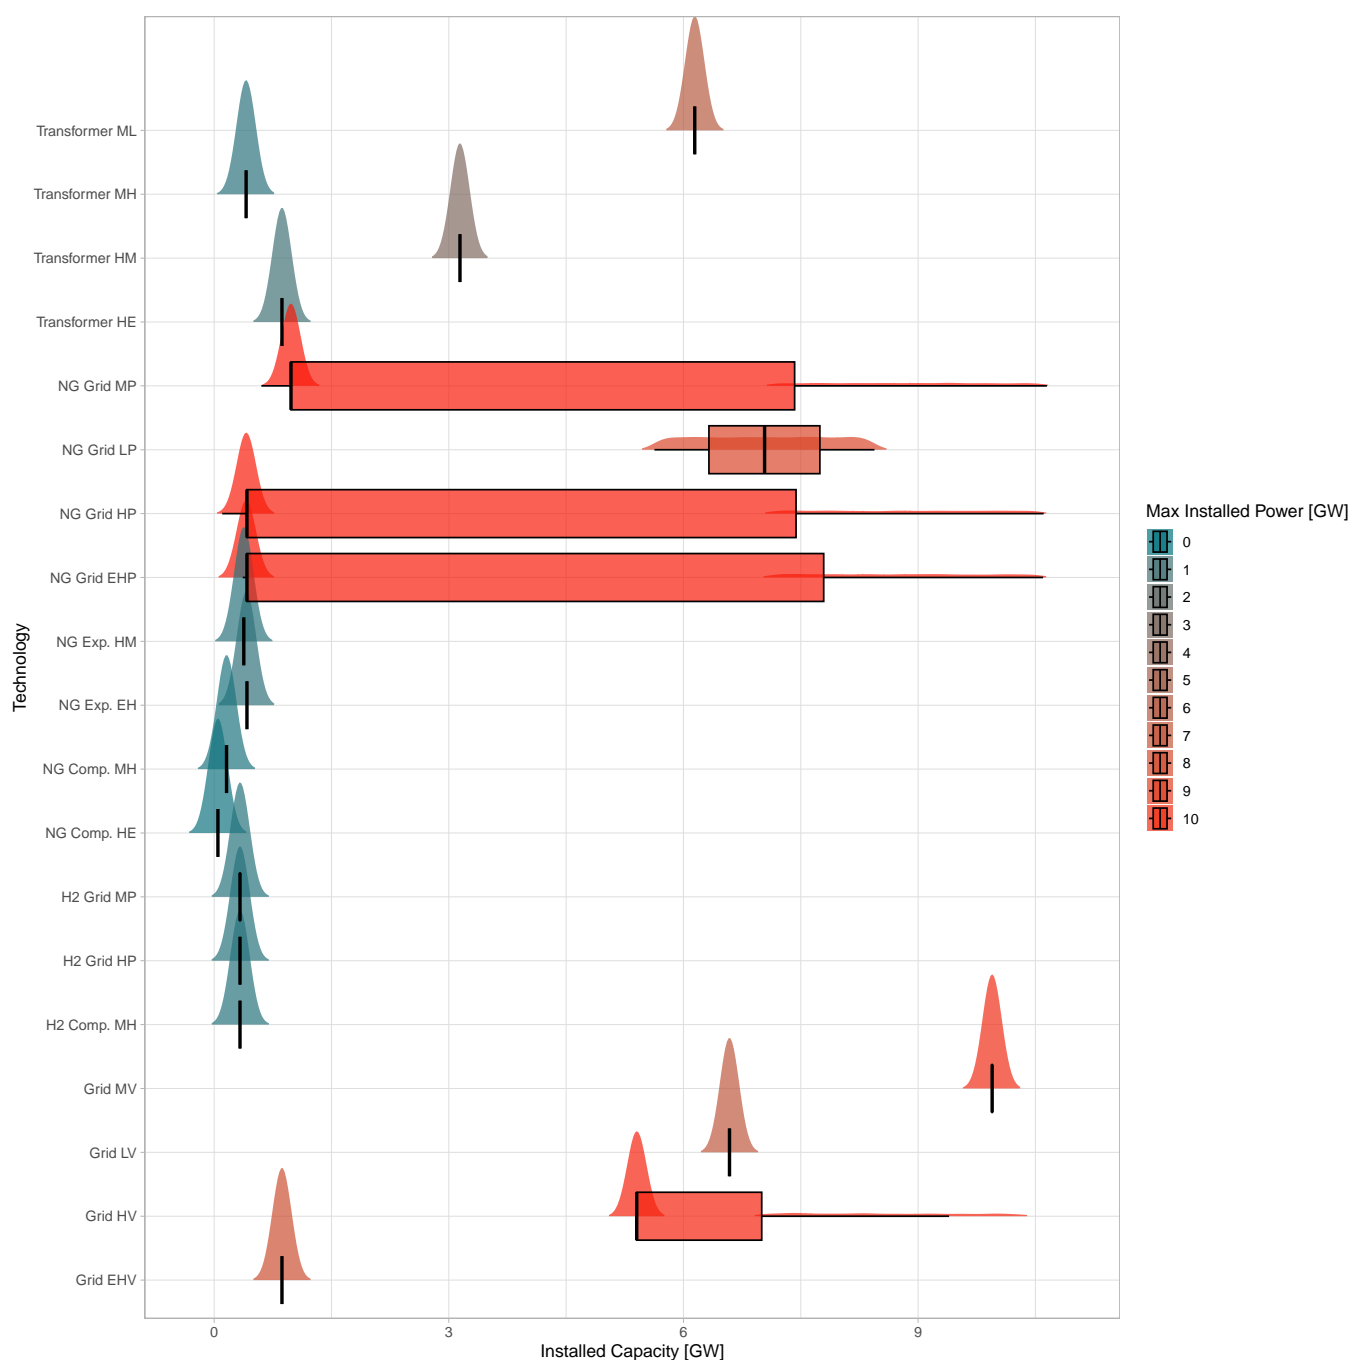

**Figure S2.** Frequency of appearance and Boxplot of the installed distribution technologies size applying the Monte-Carlo approach.  
Case study of the economic optimization of a neutral (no net emissions) and independent (no imports) Swiss energy system in 2050.

57 The uncertainty analysis applied to the energy-independence and CO<sub>2</sub>-neutrality case study of Switzerland  
58 led to different energy system configurations characterized by different installed capacities. Figure S2

**Table S4.** Grid installed capacities peaks, for the Swiss 2050 neutral and independent energy system configuration economic optimization under 50 000 Monte Carlo iterations.

The value in brackets correspond to the probability of the peak, according to the frequency of appearance within the uncertainty analysis.

| Grid     | Power level | Existing capacity<br>$S_{g}^{inst,ext}$<br>[GW] | Peak 1<br>$S_{g}^1$<br>[GW]        | Peak 2<br>$S_{g}^2$<br>[GW]       |
|----------|-------------|-------------------------------------------------|------------------------------------|-----------------------------------|
| Elec.    | EHV         | $6.297^{+0.787}_{-0.787}$                       | $1.064^{+0.013}_{-0.695}$ (100 %)  | -                                 |
|          | HV          | $8.668^{+1.086}_{-1.086}$                       | $5.434^{+0.093}_{-0.028}$ (93.9 %) | $7.843^{+1.623}_{-1.459}$ (6.1 %) |
|          | MV          | $5.574^{+0.697}_{-0.697}$                       | $10.185^{+0.047}_{-0.089}$ (100 %) | -                                 |
|          | LV          | $4.150^{+0.519}_{-0.519}$                       | $6.589^{+0.000}_{-0.000}$ (100 %)  | -                                 |
| Methane  | EHP         | $8.838^{+1.101}_{-1.1012}$                      | $0.445^{+0.044}_{-0.122}$ (94.6 %) | $8.838^{+1.009}_{-1.018}$ (5.4 %) |
|          | HP          | $8.838^{+1.101}_{-1.01}$                        | $0.472^{+0.036}_{-0.074}$ (94.6 %) | $8.838^{+1.017}_{-1.008}$ (5.4 %) |
|          | MP          | $8.876^{+1.110}_{-1.110}$                       | $0.903^{+0.029}_{-0.264}$ (94.5 %) | $8.876^{+1.081}_{-1.077}$ (5.5 %) |
|          | LP          | $7.036^{+0.880}_{-0.880}$                       | $6.395^{+1.018}_{-1.001}$ (100 %)  | -                                 |
| Hydrogen | EHP         | -                                               | -                                  | -                                 |
|          | HP          | -                                               | $0.330^{+0.000}_{-0.037}$ (100 %)  | -                                 |
|          | MP          | -                                               | $0.330^{+0.003}_{-0.037}$ (100 %)  | -                                 |
|          | LP          | -                                               | -                                  | -                                 |

depicts the frequency of appearance and distribution technologies at a given installed capacity. It is possible to distinguish between three types of distributions; (i) the robust solutions, where independent of the variation, the capacity remains constant, such as EHV Grid or the NG transformers, (ii) almost uniform spread out technologies (NG Grid LP) and (iii) technologies with multiples peaks (Grid EHV, NG Grid EHP).

It is the third category indicating the reaching of a tilting point towards the switching of another configuration rather than continuously moving. Identifying correlations between peaks of different configurations under uncertainty is a point to be treated in a future publication.

The robustness of the model can be assessed by assessing the peak distribution and attributing the probability of appearance (figure S2). The results are summarized in table S4 and show, that the deployed capacity of the grids is robust at a minimum level of 94.5 %. It can be noted, that the apparition of secondary peaks is due to the uncertainty relying on the estimation of the existing capacity of the grids, as the secondary peaks in the methane grids are following the uncertainty distribution of the existing capacity  $\pm 25\%$ .

## Seasonal intermittence

Besides the installed power, the configuration is subject to the seasonal operation of the capacities. Figure S3 depicts the monthly average use of the technologies corresponding to the median configuration of the case study.

It is possible to identify three types of technologies; (i) constant technologies, responding to annually constant demands such as industry or freight mobility, (ii) seasonal intermittent technologies such as the renewable energy carriers or technologies responding to seasonal varying demands such as domestic heating, and (iii) the back-up technologies to compensate for the reaching of a potential limitation or seasonal discrepancy.

We can observe that distribution technologies are following the same pattern, where (i) the hydrogen technologies are used at constant rate to power the freight hydrogen technologies, (ii) the distribution grid

83 follows the intermittency of the wind and photovoltaics variations, and (iii) the methane gas expanders are correlated to the natural gas storage emptying.

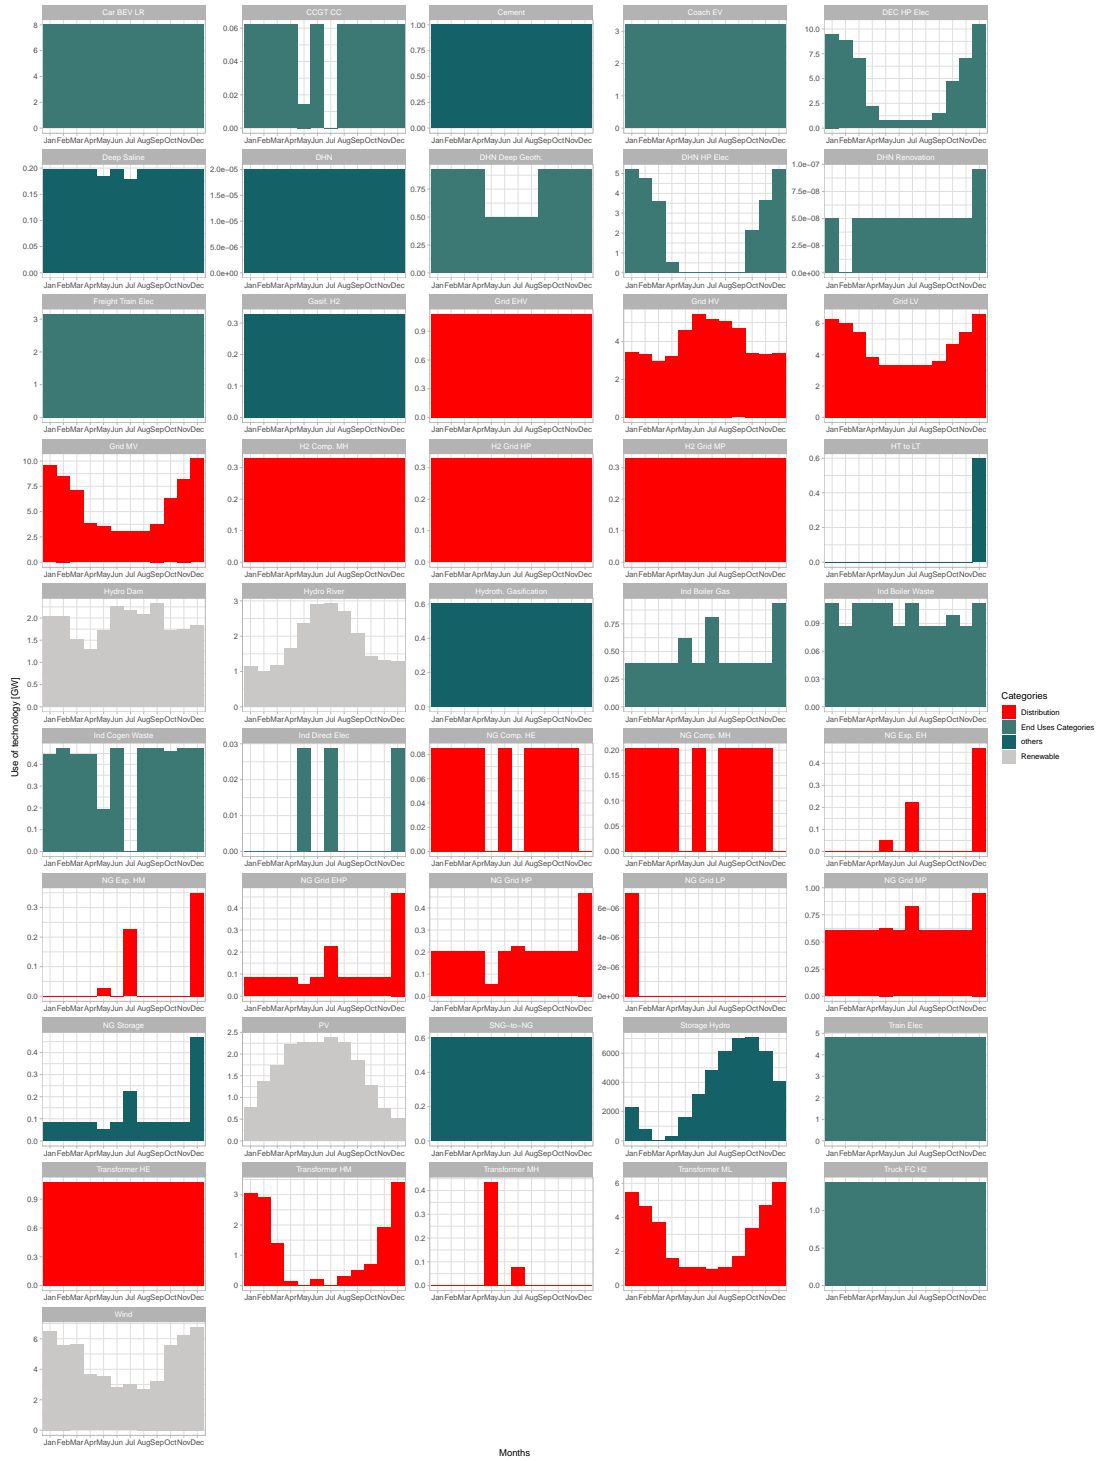

**Figure S3.** Seasonal utilization of the technologies. Case study of the economic optimization of a neutral (no net emissions) and independent (no imports) Swiss energy system in 2050.

## THE ROLE OF GRID REINFORCEMENT

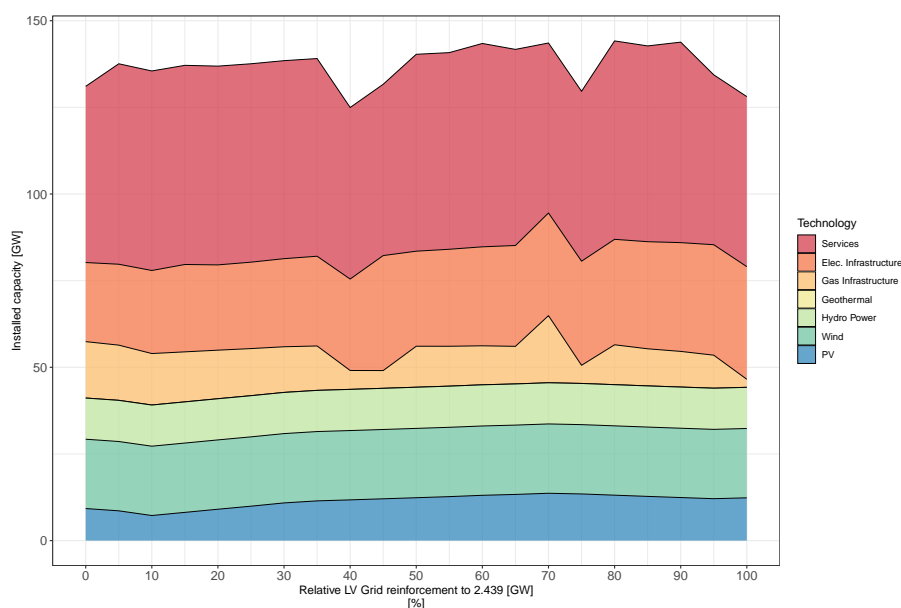

**Figure S4.** Evolution of the installed capacities of the Swiss energy system according to LV grid reinforcement according to the energy system costs in Figure 9 (a) of the main paper. Case study of the economic optimization of a neutral (no net emissions) and independent (no imports) Swiss energy system in 2050.

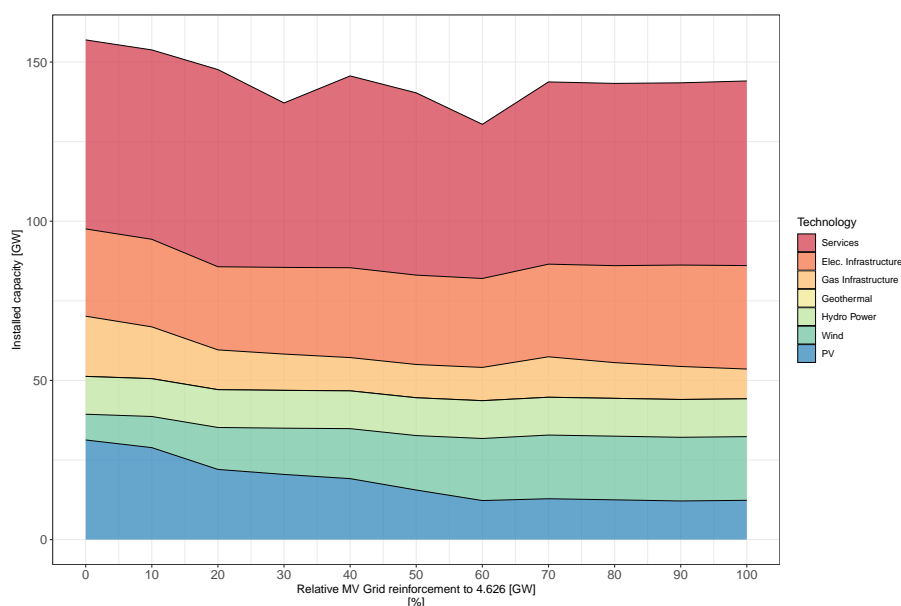

**Figure S5.** Evolution of the installed capacities of the Swiss energy system according to MV grid reinforcement according to the energy system costs in Figure 9 (b) of the main paper. Case study of the economic optimization of a neutral (no net emissions) and independent (no imports) Swiss energy system in 2050.

## THE INTERPLAY OF WIND AND PHOTOVOLTAICS

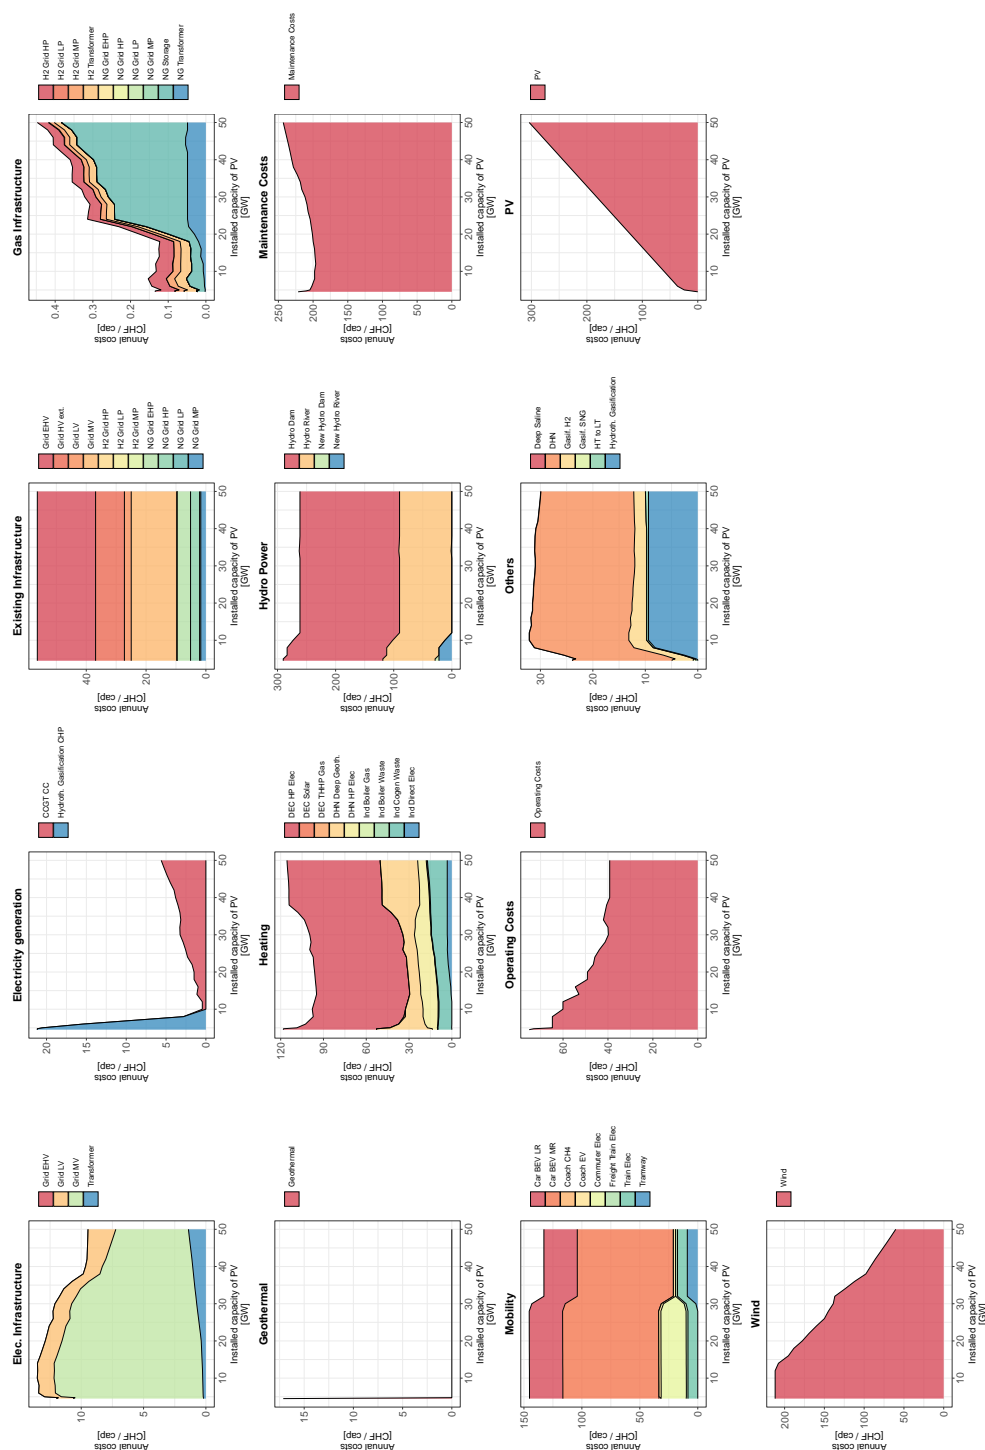

**Figure S6.** Evolution of detailed investments of the Swiss energy system according to PV penetration in 2050.

Case study of the economic optimization of a neutral (no net emissions) and independent (no imports) Swiss energy system in 2050.



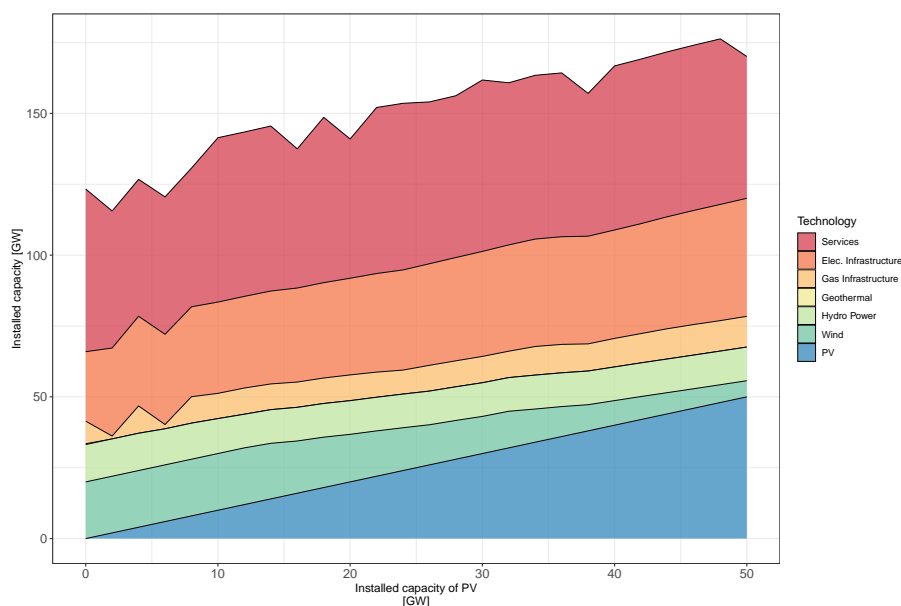

**Figure S7.** Evolution of installed capacities of the Swiss energy system according to PV penetration in 2050 according to the energy system costs in Figure 11 of the main paper. Case study of the economic optimization of a neutral (no net emissions) and independent (no imports) Swiss energy system in 2050.

## ABOUT THE NON-CONTINUOUS EVOLUTION OF THE DEPLOYED CAPACITIES

Figures S4, S5 and S7 represent the installed power of the different technologies from figures 9 and 11 in the main paper. One can observe the jumps in the total power deployed along the parametrization, which results in a gradual evolution within the total cost composition. One can therefore expect to have the same smooth behavior in the total capacities deployment as in the total cost evolution.

These jumps indicate switches in the energy system configuration, whose origin can be located in the mixed integer linear type of the model, generating equivalent solutions from the objective function point of view. In order to prove the latter hypothesis, the configuration at 20 GW of photovoltaic deployment, as observed in figure S7 has been interpolated with the capacities at the upper (22 GW) and lower (18 GW) configurations, and entered as constraints in the model. The resulting cost differs by  $8.07 \times 10^{-11}$  from the original cost, value being under the *mipgap* threshold of  $1 \times 10^{-10}$  and therefore equivalent from the optimisation point of view.

The existence of equivalent solutions from an economic optimization point of view is not expected to affect the presented results, as the uncertainty analysis depicted the validity range of the methodology presented. However, exploring and identifying the space of equivalent solutions from an economic optimization point of view within a MILP problem will be subject to a future publication.

## REFERENCES

- 100 Gupta, R., Sossan, F., and Paolone, M. (2021). Countrywide PV hosting capacity and energy storage  
101 requirements for distribution networks: The case of Switzerland. *Applied Energy* 281, 116010. doi:10/  
102 gmnvcm
- 103 Kost, Michael (2021). *Gesamtenergiestatistik 2020*. Tech. Rep. 10537, BFE, Bern
- 104 Limpens, G., Moret, S., Jeanmart, H., and Maréchal, F. (2019). EnergyScope TD: A novel open-source  
105 model for regional energy systems. *Applied Energy* 255, 113729. doi:10.1016/j.apenergy.2019.113729
- 106 [Dataset] Swissgrid (2022). Aggregated energy data of the control block Switzerland
